# Supplementary material for: Characterization of the pgf operon involved in the posttranslational modification of Streptococcus mutans surface proteins
Source: PubMed Central journal article supplement (PMC5856776; doi:10.1038/s41598-018-23170-3), 2018-03-16
Supplement: 41598_2018_23170_MOESM1_ESM.pdf [file 41598_2018_23170_MOESM1_ESM.pdf]

# **Characterization of the *pgf* operon involved in the posttranslational modification of *Streptococcus mutans* surface proteins**

**Alejandro Avilés-Reyes<sup>1</sup>, Irlan Almeida Freires<sup>1</sup>, Richard Besingi<sup>1</sup>, Sangeetha Purushotham<sup>2</sup>, Champion Deivanayagam<sup>2</sup>, L. Jeannine Brady, Jacqueline Abranches<sup>1\*</sup> and José A. Lemos<sup>1\*</sup>**

<sup>1</sup>Department of Oral Biology, University of Florida, College of Dentistry, Gainesville, FL

<sup>2</sup>Department of Biochemistry and Molecular Genetics, University of Alabama, Birmingham, AL

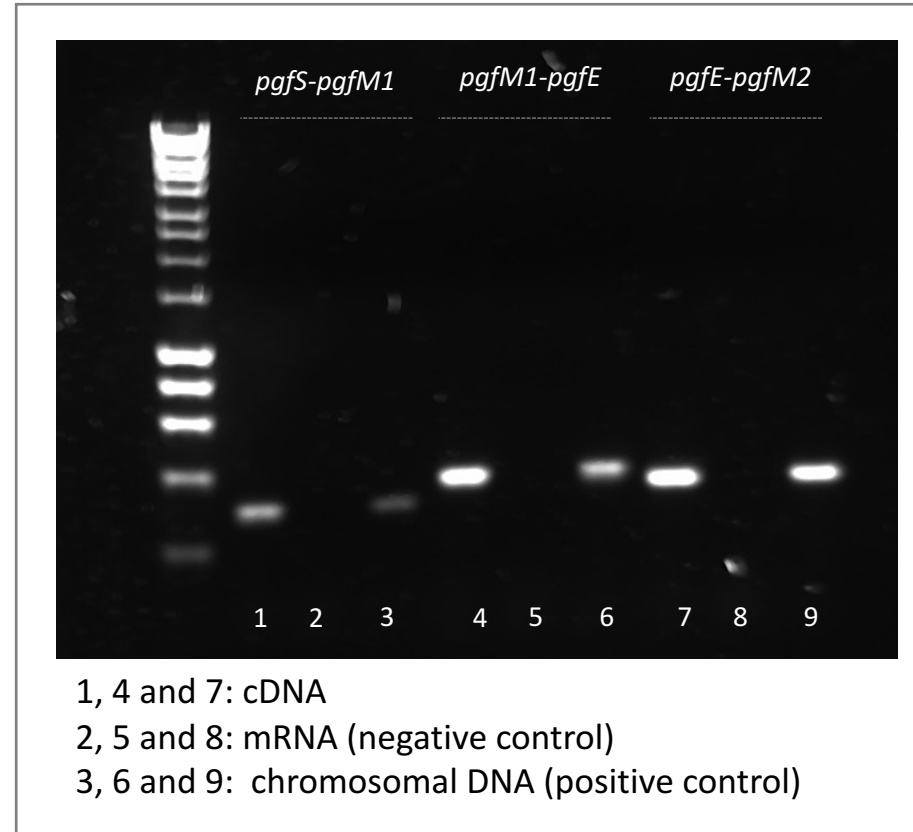

**Figure S1.** PCR products generated by RT-PCR. Shown is an ethidium bromide-stained agarose gel of products obtained with primers spanning the intergenic regions between *pgfS-pgfM1* (lanes 1 to 3), *pgfM1-pgfE* (lanes 4 to 6) and *pgfE-pgfM2* (lanes 7 to 9). Products from the PCR were derived with the following: cDNA prepared from *S. mutans* OMZ175 mRNA (lanes 1, 4 and 7), a negative control using mRNA but omitting RT (lanes 2, 5 and 8), and a positive chromosomal DNA control (lanes 3, 6 and 9).

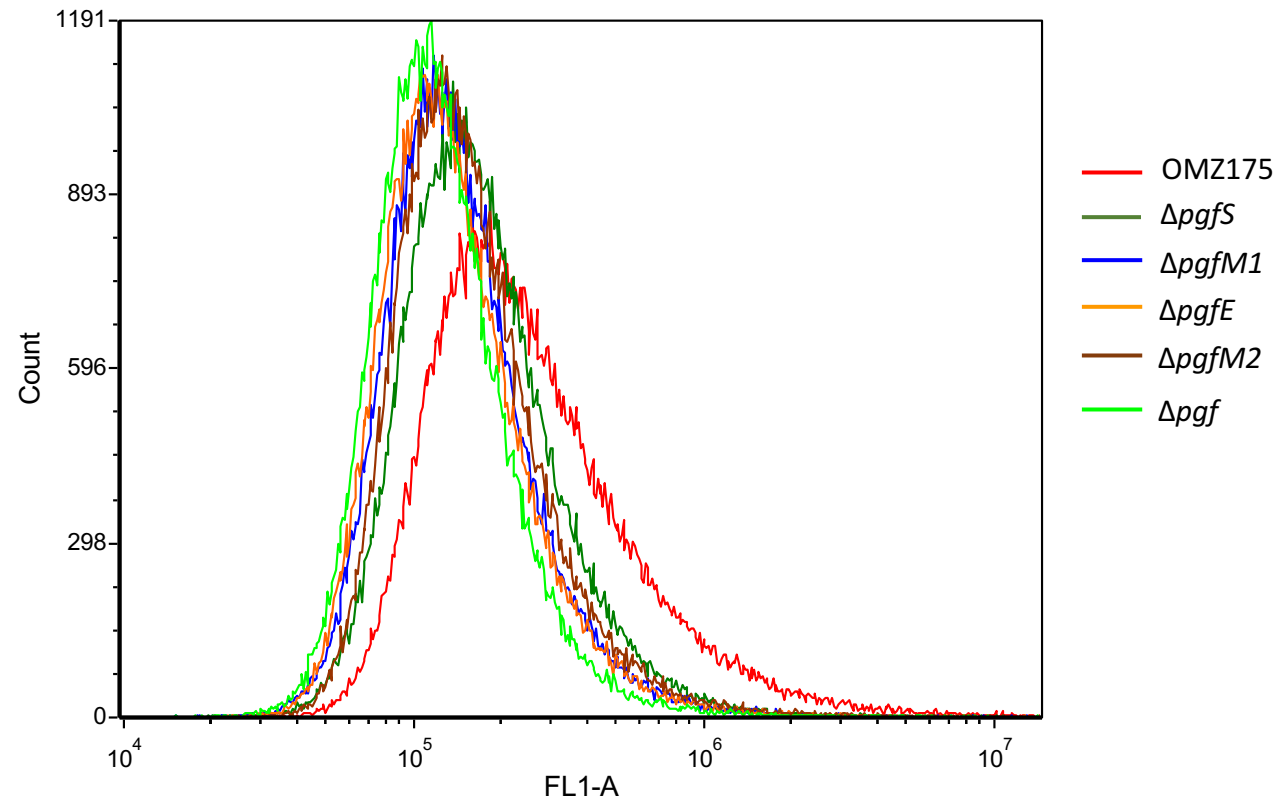

**Figure S2.** Representative histograms of expression of Cnm on the surface of OMZ175 and its  $\Delta pgf$  derivatives by flow cytometry. Refer to Figure 4 and methods section for additional details.

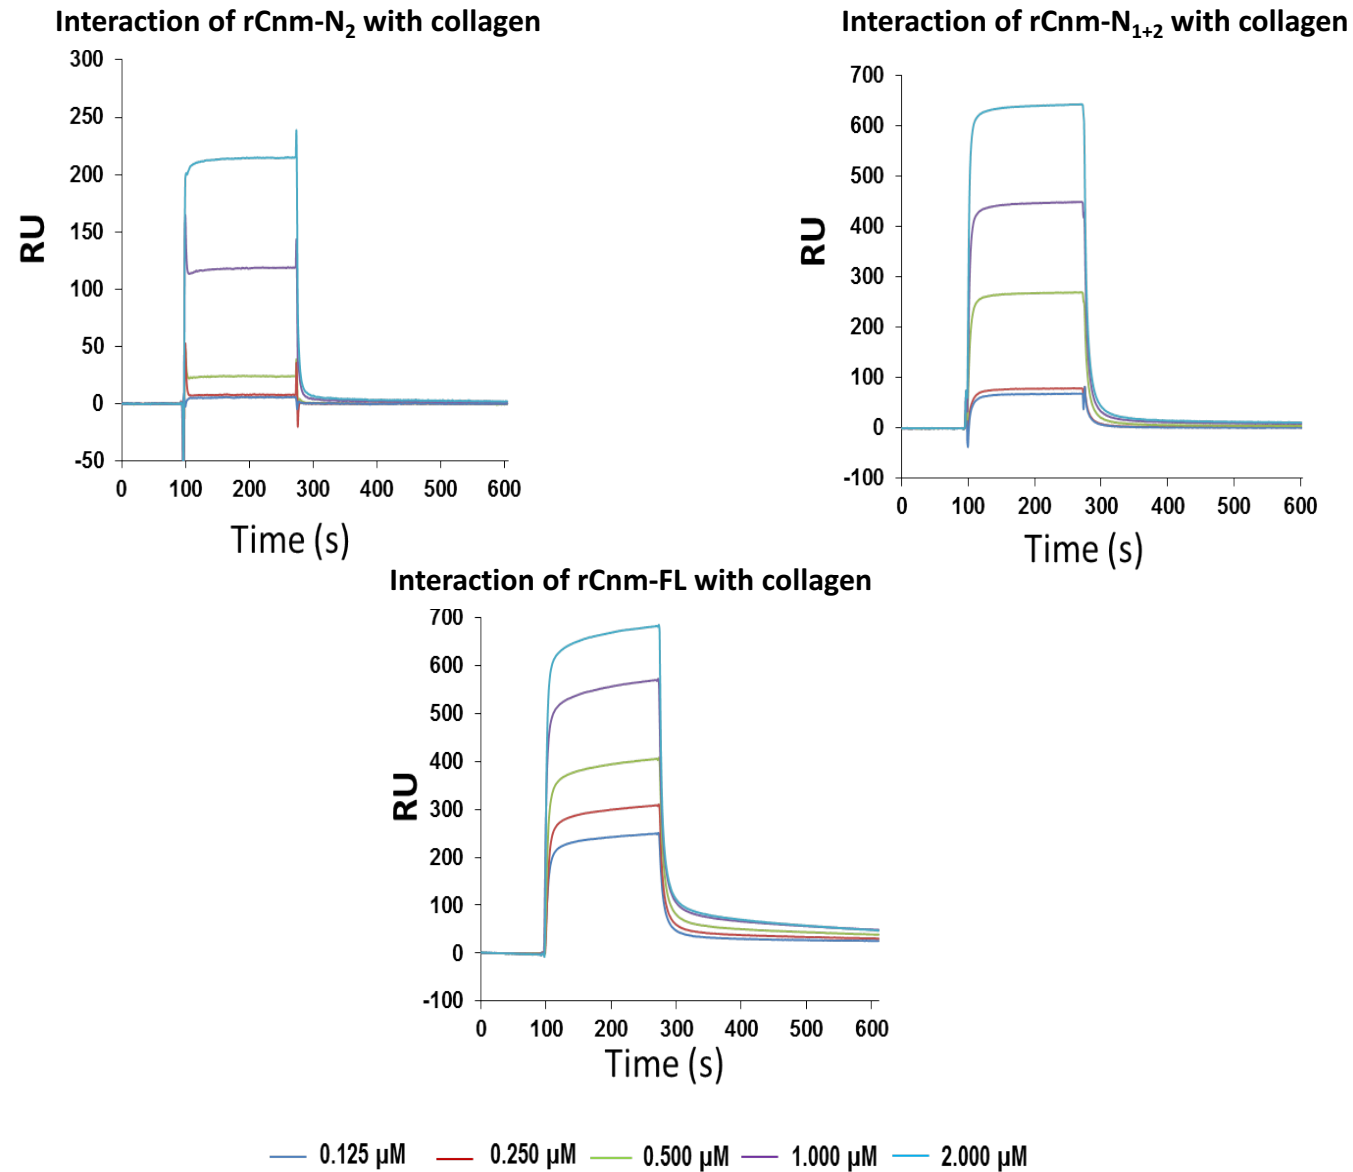

**Figure S3.** Surface Plasmon Resonance (SPR) sensograms of binding of different Cnm fragments to immobilized collagen. Refer to Figure 4 and methods section for additional details.
